# Supplementary material
Source: publisher figshare collection journal article supplement (https://gsapubs.figshare.com/articles/dataset/_/15175932)
Supplement: Supplementary file 1 [file 2]

## Sheet: SW Quaternary basalt ages
Quaternary age dates for basaltic volcanoes of Southwest
State	Volcanic field name		# Quaternary	# <50 ka	Age data (Ma)*	Error (+/- Ma)**	Method	Data sources		Comments
Arizona	Geronimo-San Bernardino		130	0	0.26	0.02	K/Ar	Kempton et al. (1987)		Number of vents from Biggs et al. (1999); age is for north flow of Cinder Hill
					0.274	0.05	K/Ar	Reynolds et al. (1986); Damon et al. (1996)		Magnus maar
					0.67	0.01	K/Ar	Kempton et al. (1987)
					1	0.1	K/Ar	Reynolds et al. (1986)		Paramore flow
					1.48	0.02	K/Ar	Kempton et al. (1987)		Krentz Ranch basanite flow
	San Carlos		3	0	0.58	0.12	K/Ar	Reynolds et al. (1986, as reported in Bernatowicz, 1981)		Number of vents from Wrucke et al. (2004)
					0.93	0.08	K/Ar	Reynolds et al. (1986)		Peridot Mesa basalt flow
					2	0.01	K/Ar	Wrucke et al. (2004)		Basalt of Bronco Gulch
	Sentinel-Arlington		21	0	1.08	0.15	40Ar/39Ar	Cave (2014)		Malpais Low Shield; Total number of vents mapped by Cave (2014)
					1.25	0.024	40Ar/39Ar	Cave (2014)		Wild Horse Low Shield
					1.71	0.054	40Ar/39Ar	Cave (2014)		Theba Low Shield
					1.72	0.46	K/Ar	Reynolds et al. (1986)		Midway Cone
					1.91	0.59	40Ar/39Ar	Cave (2014)		Painted Rock Low Shield
					2.3	0.035	40Ar/39Ar	Cave (2014)		Oatman Low Shield
					2.37	0.02	40Ar/39Ar	Cave (2014)		Arlington Mountain
	San Francisco		260	2	0.0009	5e-06	Multiple	Elson et al. (2011)		Total Quaternary volcano count based on constant rate of ~100 eruptions per Ma (inferred from Tanaka et al., 1986), does not account for possible buried vents; age is for Sunset Crater.
					0.15	0.03	K/Ar	Moore and Wolfe (1987)		Merriam-Sproul
					0.019		Multiple	Duffield et al. (2006)		Merriam
					0.051	0.046	K/Ar	Moore and Wolfe (1987)		Strawberry Crater
					0.05	0.001	3He	Rittenour et al. (2015)		Strawberry Crater
					0.13	0.04	40Ar/39Ar	Morgan et al. (2004)		Strawberry Crater
					0.055	0.014	K/Ar	Moore and Wolfe (1987)		2929 (Oneill Crater)
					0.067	0.003	3He	Fenton and Niedermann (2014)		Doney Crater
					0.071	0.004	K/Ar	Ulrich and Bailey (1987)		SP Crater
					0.05	0.001	3He	Rittenour et al. (2015)		SP rim
					0.071	0.004	40Ar/39Ar	Fenton et al. (2013)		SP flow
					0.07	0.07	3He	Fenton and Niedermann (2014)		SP Crater
					0.14	0.04	40Ar/39Ar	Conway et al (1998)		V4703
					0.5	0.09	K/Ar	Moore and Wolfe (1987)		Qbb Wupatki flow
					0.15	0.07	40Ar/39Ar	Hanson (2008)		Qbb Wupatki flow
					0.17	0.06	K/Ar	Moore and Wolfe (1987)		2019
					0.18	0.09	40Ar/39Ar	Conway et al (1998)		V4710
					0.19	0.012	3He	Fenton and Niedermann (2014)		South Sheba Crater
					0.22	0.08	40Ar/39Ar	Conway et al (1998)		V4708
					0.22	0.05	K/Ar	Ulrich and Bailey (1987)		V5831
					0.27	0.08	K/Ar	Moore and Wolfe (1987)		3904
					0.28	0.05	40Ar/39Ar	Conway et al. (1997)		TW1-4
					0.3	0.11	40Ar/39Ar	Conway et al. (1997)		SM1-1
					0.31	0.04	40Ar/39Ar	Conway et al (1998)		V4726
					0.33	0.08	K/Ar	Wolfe et al. (1987a)		A1 Mtn flow
					0.34	0.07	K/Ar	Moore and Wolfe (1987)		3022
					0.34	0.21	K/Ar	Wolfe et al. (1987a)		3521
					0.35	0.13	K/Ar	Wolfe et al. (1987a)		3616
					0.39	0.11	K/Ar	Wolfe et al. (1987a)		3608
					0.42	0.06	K/Ar	Wolfe et al. (1987a)		3621 or 3621A
					0.44	0.018	K/Ar	Wolfe et al. (1987a)		Wing Mtn Flow
					0.46	0.05	K/Ar	Ulrich and Bailey (1987)		SP Tank Flow
					0.49	0.11	K/Ar	Moore and Wolfe (1987)		3018
					0.53	0.08	K/Ar	Wolfe et al. (1987b)		V4536
					0.56	0.08	K/Ar	Wolfe et al. (1987a)		3522
					0.59	0.09	K/Ar	Moore and Wolfe (1987)		3809A
					0.61	0.03	40Ar/39Ar	Hanson (2008)		Arrowhead Sink Flow
					0.66	0.11	K/Ar	Ulrich and Bailey (1987)		V4624
					0.69	0.13	K/Ar	Wolfe et al. (1987a)		2519
					0.72	0.12	K/Ar	Wolfe et al. (1987a)		Qbhb
					0.74	0.11	40Ar/39Ar	Conway et al. (1997)		RM1 Red Mtn
					0.74	0.08	K/Ar	Ulrich and Bailey (1987)		Qbb
					0.77	0.04	K/Ar	Ulrich and Bailey (1987)		V6713
					0.76	0.05	40Ar/39Ar	Conway et al. (1997)		MB-01 Mesa Butte
					0.8	0.08	40Ar/39Ar	Conway et al. (1997)		Mb-03 Mesa butte
					0.82	0.06	40Ar/39Ar	Conway et al. (1997)		MB-05 Mesa Butte
					0.83	0.08	40Ar/39Ar	Conway et al. (1997)		MB-06 Mesa Butte
					0.85	0.1	40Ar/39Ar	Conway et al. (1997)		MB-07 Mesa Butte
					0.85	0.06	40Ar/39Ar	Conway et al. (1997)		MB-08 Mesa Butte
					0.88	0.08	40Ar/39Ar	Conway et al. (1997)		MB-04 Mesa Butte
					0.83	0.04	K/Ar	Ulrich and Bailey (1987)		V6604
					0.85	0.12	K/Ar	Moore and Wolfe (1987)		Qmb
					2.43	0.32	K/Ar	Ulrich and Bailey (1987)		Black Point Flow
					0.873	0.008	40Ar/39Ar	Hanson (2008)		Black Point Flow
					0.86	0.02	40Ar/39Ar	Hanson (2008)		Citadel (Prob. Black Point outlier)
					0.87	0.04	40Ar/39Ar	Hanson (2008)		Citadel (Prob. Black Point outlier)
					0.89	0.17	40Ar/39Ar	Hanson (2008)		Red House Basin Flow - prob. correlative to Black Point FLow
					0.9	0.08	40Ar/39Ar	Conway et al. (1997)		FV1 Mesa Butte
					0.96	0.08	K/Ar	Wolfe et al. (1987a)		Qmbn
					0.96	0.94	K/Ar	Wolfe et al. (1987a)		Qmbn
					1.07	0.15	K/Ar	Moore and Wolfe (1987)		Qmb Woodhouse Mesa Flow
					0.96	0.03	4-Ar/39Ar	Hanson (2008)		Qmb Woodhouse Mesa Flow
					1.01	0.13	K/Ar	Ulrich and Bailey (1987)		Lava Point Flow
					1.04	0.04	K/Ar	Ulrich and Bailey (1987)		6609
					1.02	0.03	40Ar/39Ar	Conway et al. (1997)		MB-02
					1.04	0.14	K/Ar	Ulrich and Bailey (1987)		V5806
					1.07	0.06	K/Ar	Newhall et al. (1987)		3335
					1.08	0.28	K/Ar	Wolfe et al. (1987a)		Qmbn
					1.09	0.03	K/Ar	Ulrich and Bailey (1987)		Large Whiskers Tank Flow
					1.15	0.65	K/Ar	Wolfe et al. (1987a)		3433
					1.16	0.04	K/Ar	Wolfe et al. (1987a)		V0614
					1.2	0.05	K/Ar	Ulrich and Bailey (1987)		V6811
					1.29	0.15	K/Ar	Wolfe et al. (1987a)		Qmbn
					1.3	0.2	40Ar/39Ar	Conway et al. (1997)		CM2-4 Chapel Mtn
					1.38	0.16	K/Ar	Ulrich and Bailey (1987)		V6609
					1.39	0.06	K/Ar	Wolfe et al. (1987a)		Government Prairie Vent
					1.29	0.23	K/Ar	Wolfe et al. (1987a)		Government Prairie Vent
					1.44	0.03	K/Ar	Wolfe et al. (1987a)		Government Prairie Vent
					1.4	0.1	40Ar/39Ar	Conway et al. (1997)		CM1-5 Chapel Mtn
					1.41	0.13	K/Ar	Wolfe et al. (1987a)		2420
					1.51	0.28	K/Ar	Moore and Wolfe (1987)		Qmb
					1.61	0.05	K/Ar	Wolfe et al. (1987a)		V0603
					2.01	0.22	K/Ar	Wolfe et al. (1987a)		V3611
					2.08	0.48	K/Ar	Newhall et al. (1987)		1219 QTmb
	Springerville		501	0	0.3		40Ar/39Ar	Mnich and Condit (2018), incl. Supplementary Material		Vent 8510B, total fusion age; Total number of vents from Mnich and Condit (2018)
					0.31	0.07	K/Ar	Condit et al. (1999)		832
					0.49	0.03	K/Ar	Condit et al. (1999)		9313
					0.5	0.03	K/Ar	Condit et al. (1999)		Vent 8435
					0.61	0.01	K/Ar	Condit et al. (1999)		9735
					0.67	0.02	K/Ar	Condit et al. (1999)		8627
					0.75	0.13	K/Ar	Condit et al. (1999)		823
					0.76	0.02	K/Ar	Condit et al. (1999)		8627
					0.82	0.04	K/Ar	Condit et al. (1999)		Coyote Hills Shield volcano
					0.84	0.07	K/Ar	Condit et al. (1999)		729
					0.91	0.02	K/Ar	Condit et al. (1999)		9615
					1	0.02	K/Ar	Condit et al. (1999)		1514
					1.01	0.02	K/Ar	Condit et al. (1999)		9420
					1.017	0.006	40Ar/39Ar	Mnich and Condit (2018) Supplementary Material		Vent 8501A, plateau age
					1.04	0.05	K/Ar	Condit et al. (1999)		735
					1.05	0.04	K/Ar	Condit et al. (1999)		727
					1.19	0.04	K/Ar	Condit et al. (1999)		605
					1.27	0.07	K/Ar	Condit et al. (1999)		8730
					1.3	0.04	K/Ar	Condit et al. (1999)		8727
					1.3	0.05	K/Ar	Condit et al. (1999)		1511
					1.47	0.06	K/Ar	Condit et al. (1999)		7301
					1.486	0.007	40Ar/39Ar	Mnich and Condit (2018) Supplementary Material		Vent 8635B, plateau age
					1.53	0.21	K/Ar	Condit et al. (1999)		9212
					1.56	0.03	K/Ar	Condit et al. (1999)		2429
					1.56	0.05	K/Ar	Condit et al. (1999)		9507
					1.62	0.08	K/Ar	Condit et al. (1999)		8711
					1.63	0.08	K/Ar	Condit et al. (1999)
					1.65	0.09	K/Ar	Condit et al. (1999)		9334
					1.67	0.09	K/Ar	Condit et al. (1999)		826
					1.74	0.15	K/Ar	Condit et al. (1999)		9308
					1.76	0.15	K/Ar	Condit et al. (1999)
					1.78	0.22	K/Ar	Condit et al. (1999)		8321
					1.821	0.009	40Ar/39Ar	Mnich and Condit (2018) Supplementary Material		V8617 (Soldier Butte), plateau age
					1.83	0.21	K/Ar	Condit et al. (1999)		8318
					1.9	0.06	K/Ar	Condit et al. (1999)
					1.98	0.6	K/Ar	Condit et al. (1999)		1808
					2	0.11	K/Ar	Condit et al. (1999)		1207
					2.05	0.1	K/Ar	Condit et al. (1999)		7406
	Uinkaret		213	2	0.0013	0.0005	3He	Fenton et al. (2001)		Little Springs spatter contains ceramic sherds dating to 1025-1200 CE (Ort et al., 2008b); total numbe of vents from Billingsley and Hamblin (2001)
					0.037	0.003	3He	Fenton et al. (2001)		Prospect Cone
					0.073	0.004	3He	Fenton et al. (2001)		Vulcan's Throne
					0.096	0.01	40Ar/39Ar	Fenton et al. (2013)		Upper Bar Ten Flow
					0.088	0.006	3He	Fenton et al. (2001)		Bar Ten flow
					0.108	0.029	TL	Fenton et al. (2001)		Bar Ten Flow
					0.102	0.008	40Ar/39Ar	Crow et al. (2015)		Upper Gray Ledge flow, mean of mulitple analyes of six samples, mix of isochron and plateau spectra
					0.122	0.012	40Ar/39Ar	Fenton et al. (2013)		Lower Bar Ten flow
					0.203	0.024	TL	Fenton et al. (2001)		Whitmore Cascade
					0.177	0.009	3He	Fenton et al. (2001)		Whitmore Cascade
					0.186	0.013	40Ar/39Ar	Crow et al. (2015)		Upper Whitmore flows, mean of multiple plateau dates of six samples from multiple flows
					0.2	0.03	40Ar/39Ar	Crow et al. (2015)		180.8-mile flow, one isochron date
					0.201	0.034	TL	Fenton et al. (2001)		North of Vulcan's Throne
					0.208	0.014	3He	Fenton et al. (2001)		North of Vulcan's Throne
					0.203		K/Ar	Anderson and Christensen (1989)		Lower Toroweap Valley
					0.209	0.016	40Ar/39Ar	Crow et al. (2015)		Lower Gray Ledge flow, mean of plateau ages of three samples
					0.243	0.014	40Ar/39Ar	Crow et al. (2015)		Lower Whitmore flows, mean of multiple plateau analyses of six samples from multiple flows
					0.284	0.037	3He	Fenton et al. (2001)		Graham Ranch
					0.284	0.048	TL	Fenton et al. (2001)		Graham Ranch
					0.303	0.036	3He	Fenton et al. (2001)		Uppermost Prospect
					0.322	0.013	40Ar/39Ar	Crow et al. (2015) and Karlstrom et al. (2007)		177-mile flow, mean of multiple analyses of five samples
					0.395	0.035	3He	Fenton et al. (2001)		Upper Prospect Cyn
					0.407	0.07	K/Ar	Wenrich et al. (1995)		Dike eastern side of field
					0.424	0.017	40Ar/39Ar	Crow et al. (2015)		Ponderosa, one isochron date
					0.448	0.037	40Ar/39Ar	Crow et al. (2015)		Toroweap flows, mean multiple plateau dates of five samples from multiple flows
					0.492	0.032	40Ar/39Ar	Crow et al. (2015)		183.4-mile flow, mean of two plateau ages from one sample
					0.524	0.034	40Ar/39Ar	Crow et al. (2015)		Buried Cyn flows, mean of four ages, based on multiple plateau dates, from multiple flows
					0.526	0.021	40Ar/39Ar	Crow et al. (2015)		Upper Black Ledge flow, mean of multiple dates on five samples from multiple flows
					0.535	0.014	40Ar/39Ar	Crow et al. (2015)		Upper Prospect flows, mean of five samples from multiple flows
					0.572	0.052	40Ar/39Ar	Karlstrom et al. (2007)		Lower Prospect flows, mean of eight analyses of three samples
					0.575	0.019	40Ar/39Ar	Crow et al. (2015)		Lower Black Ledge flows, mean of eight samples' plateau ages
					0.617	0.038	40Ar/39Ar	Karlstrom et al. (2007)		High Remnant flows, mean of two dates from two flows, plateau ages
					0.63	0.03	40Ar/39Ar	Crow et al. (2015)		Whitmore Rapids Flow; plateau age, disturbed spectrum
					0.635	0.24	K/Ar	Jackson (1990)
					0.76	0.08	K/Ar	Wenrich et al. (1995)		Basalt flow in Tuckup Canyon
					0.829	0.009	40Ar/39Ar	Crow et al. (2015)		188.7-Mile Flow, plateau age, mean of four analyses of two samples
					0.83	0.28	K/Ar	Billingsley (1994)		Antelope Knoll Basalt
					2.63	0.34	K/Ar	Billingsley (1994)		Mount Logan basalt; included even though age estimate is slightly older than Quaternary, due to importance in volcanic stratigraphy at Uinkaret. Error on the age allows the possibility that it is actually of Quaternary age.
California	Amboy		1	0	0.079	0.005	36Cl	Phillips (2003)
					0.08		Rock varnish	Liu (2003)		Age given here is middle of range determined by Liu (2003) based upon rock varnish microstratigraphy (74-85 ka).
	Big Pine		24	5	0.017	0.001	36Cl	Vazquez and Woolford (2015)		Division Creek flow. 36Cl age reported here assume 1 mm/kyr surface erosion (see Vazquez and Woolford, 2015, for estimates accounting for other erosion rates). Note the count of volcanoes <50 ka is based upon Fig. 6 of Vazquez and Woolford (2015), recognizing that multiple volcanoes formed within individual episodes that cannot be resolved by age dates.
					0.017	0.001	36Cl	Vazquez and Woolford (2015)		Amstrong Canyon flow. 36Cl age reported here assume 1 mm/kyr surface erosion (see Vazquez and Woolford, 2015, for estimates accounting for other erosion rates).
					0.017	0.002	3He	Vazquez and Woolford (2015)		Armstrong Canyon flow. Age recalculated from Cerling (1990), Poreda and Cerling (1992) assuming 1 mm/kyr erosion rate.
					0.02	0.003	3He	Vazquez and Woolford (2015)		Armstrong Canyon flow. Age recalculated from Cerling (1990), Poreda and Cerling (1992) assuming 1 mm/kyr erosion rate.
					0.02	0.001	36Cl	Vazquez and Woolford (2015)		Taboose Canyon flow. 36Cl age reported here assume 1 mm/kyr surface erosion (see Vazquez and Woolford, 2015, for estimates accounting for other erosion rates).
					0.016	0.001	36Cl	Vazquez and Woolford (2015)		Taboose Canyon flow. 36Cl age reported here assume 1 mm/kyr surface erosion (see Vazquez and Woolford, 2015, for estimates accounting for other erosion rates).
					0.015	0.001	36Cl	Vazquez and Woolford (2015)		Taboose Canyon flow. 36Cl age reported here assume 1 mm/kyr surface erosion (see Vazquez and Woolford, 2015, for estimates accounting for other erosion rates).
					0.027	0.002	36Cl	Vazquez and Woolford (2015)		Blackrock Spring flow. 36Cl age reported here assume 1 mm/kyr surface erosion (see Vazquez and Woolford, 2015, for estimates accounting for other erosion rates).
					0.04	0.003	36Cl	Vazquez and Woolford (2015)		Aberdeen flow. 36Cl age reported here assume 1 mm/kyr surface erosion (see Vazquez and Woolford, 2015, for estimates accounting for other erosion rates).
					0.032	0.012	40Ar/39Ar	Blondes et al. (2008)		Same flow as Aberdeen flow in Vazquez and Woolford (2015).
					0.062	0.023	40Ar/39Ar	Blondes et al. (2008)
					0.091	0.018	40Ar/39Ar	Blondes et al. (2008)
					0.208	0.023	40Ar/39Ar	Blondes et al. (2008)
					0.469	0.009	40Ar/39Ar	Blondes et al. (2008)
					0.748	0.031	40Ar/39Ar	Blondes et al. (2008)
					0.776	0.034	40Ar/39Ar	Blondes et al. (2008)
					0.785	0.018	40Ar/39Ar	Blondes et al. (2008)
					1.224	0.024	40Ar/39Ar	Blondes et al. (2008)
					1.273	0.119	40Ar/39Ar	Blondes et al. (2008)
	Coso		19	1	0.039	0.033	K-Ar	Duffield et al. (1980)
					0.14	0.089	K-Ar	Duffield et al. (1980)
					0.188	0.035	K-Ar	Duffield et al. (1980)
					0.234	0.022	K-Ar	Duffield et al. (1980)
					0.399	0.045	K-Ar	Duffield et al. (1980)
					0.486	0.108	K-Ar	Duffield et al. (1980)
					1.07	0.12	K-Ar	Duffield et al. (1980)
					1.07	0.14	K-Ar	Duffield et al. (1980)
					1.08	0.06	K-Ar	Duffield et al. (1980)
					2.06	0.34	K-Ar	Duffield et al. (1980)
	Cima		30	2	0.0116	0.0016	36Cl	Dohrewend et al. (1986); Phillips (2003)		Cima A flow. 36Cl age reported here assumes 1mm/yr surface erosion (see Phillips, 2003). Multiiple age determinations were completed for some Cima volcanoes, but only those which are in boxes were confirmed in this study to share a common volcano. Fieldwork would be necessary to otherwise relate to each other the K-Ar ages reported in Dohrenwend et al. (1984) and (1986). As a result, more ages th…
					0.0115	0.0011	36Cl	Phillips (2003)		Cima A flow. 36Cl age reported here assumes 1mm/yr surface erosion (see Phillips, 2003).
					0.0213	0.0016	36Cl	Phillips (2003)		Cima A flow. 36Cl age reported here assumes 1mm/yr surface erosion (see Phillips, 2003).
					0.106	0.07	40Ar/39Ar	Turrin and Champion (1991)		Cima A flow.
					0.114	0.07	40Ar/39Ar	Turrin and Champion (1991)		Cima A flow.
					0.128	0.06	40Ar/39Ar	Turrin and Champion (1991)		Cima A flow.
					0.161	0.207	40Ar/39Ar	Turrin and Champion (1991)		Cima A flow.
					0.0258	0.0014	36Cl	Phillips (2003)		Cima I flow. 36Cl age reported here assumes 1mm/yr surface erosion (see Phillips, 2003).
					0.0284	0.007	36Cl	Phillips (2003)		Cima I flow. 36Cl age reported here assumes 1mm/yr surface erosion (see Phillips, 2003).
					0.0272	0.0024	36Cl	Phillips (2003)		Cima I flow. 36Cl age reported here assumes 1mm/yr surface erosion (see Phillips, 2003).
					0.0456	0.0019	36Cl	Phillips (2003)
					0.06	0.03	K-Ar	Dohrenwend et al. (1984, 1986)		Cima U flow
					0.07	0.02	K-Ar	Wilshire (1992)
					0.09	0.07	K-Ar	Turrin et al. (1984; as reported in Wilshire, 1992)
					0.13	0.03	K-Ar	Turrin et al. (1984; as reported in Wilshire, 1992)
					0.13	0.06	K-Ar	Dohrenwend et al. (1984)
					0.14	0.04	K-Ar	Turrin et al. (1984; as reported in Wilshire, 1992)
					0.15	0.04	K-Ar	Turrin et al. (1984; as reported in Wilshire, 1992)
					0.15	0.06	K-Ar	Turrin et al. (1984; as reported in Wilshire, 1992)
					0.16	0.04	K-Ar	Dohrenwend et al. (1984)
					0.16	0.07	K-Ar	Turrin et al. (1984; as reported in Wilshire, 1992)
					0.17	0.02	K-Ar	Wilshire (1992)
					0.17	0.04	K-Ar	Dohrenwend et al. (1984)
					0.17	0.04	K-Ar	Dohrenwend et al. (1984)
					0.17	0.04	K-Ar	Dohrenwend et al. (1984)
					0.17	0.06	K-Ar	Turrin et al. (1984; as reported in Wilshire, 1992)
					0.22	0.03	K-Ar	Dohrenwend et al. (1986)		Cima G flow
					0.24	0.04	K-Ar	Turrin et al. (1984; as reported in Wilshire, 1992)
					0.25	0.05	K-Ar	Dohrenwend et al. (1984)
					0.26	0.12	K-Ar	Dohrenwend et al. (1984)
					0.27	0.1	K-Ar	Dohrenwend et al. (1984)
					0.27	0.02	K-Ar	Wilshire (1992)
					0.27	0.07	K-Ar	Dohrenwend et al. (1984)
					0.27	0.05	K-Ar	Dohrenwend et al. (1984)
					0.32	0.09	K-Ar	Dohrenwend et al. (1984)
					0.32	0.02	K-Ar	Dohrenwend et al. (1984)
					0.33	0.16	K-Ar	Dohrenwend et al. (1984, 1986)		Cima BB flow
					0.33	0.03	K-Ar	Dohrenwend et al. (1984, 1986)		Cima BB flow
					0.33	0.03	K-Ar	Turrin et al. (1984; as reported in Wilshire, 1992)
					0.33	0.04	K-Ar	Turrin et al. (1984; as reported in Wilshire, 1992)
					0.34	0.01	K-Ar	Wilshire (1992)
					0.39	0.08	K-Ar	Dohrenwend et al. (1984)
					0.33	0.05	K-Ar	Dohrenwend et al. (1984)
					0.35	0.04	K-Ar	Dohrenwend et al. (1986)		Cima E flow
					0.46	0.05	K-Ar	Dohrenwend et al. (1986)		Cima J flow
					0.46	0.08	K-Ar	Dohrenwend et al. (1984)
					0.5	0.03	K-Ar	Turrin et al. (1984; as reported in Wilshire, 1992)
					0.51	0.03	K-Ar	Wilshire (1992)
					0.51	0.04	K-Ar	Turrin et al. (1984; as reported in Wilshire, 1992)
					0.56	0.08	K-Ar	Dohrenwend et al. (1984)
					0.58	0.16	K-Ar	Dohrenwend et al. (1984)
					0.59	0.09	K-Ar	Dohrenwend et al. (1986)		Cima F flow
					0.59	0.12	K-Ar	Dohrenwend et al. (1986)		Cima P flow
					0.63	0.11	K-Ar	Dohrenwend et al. (1984)
					0.67	0.13	K-Ar	Dohrenwend et al. (1984)
					0.7	0.06	K-Ar	Dohrenwend et al. (1984, 1986)		Cima R flow
					0.75	0.22	K-Ar	Dohrenwend et al. (1984)
					0.85	0.05	K-Ar	Dohrenwend et al. (1984)
					0.99	0.07	K-Ar	Dohrenwend et al. (1984, 1986)		Cima K flow
					1.09	0.08	K-Ar	Dohrenwend et al. (1986)		Cima CC flow
					1.14	0.12	K-Ar	Turrin et al. (1984; as reported in Wilshire, 1992)
	Mammoth Mountain-Mono-Inyo		29	5	0.00849	9e-05	14C	Browne et al. (2010)		Red Cones. Charcoal in lake sediments 4.5 cm below scoria. Volcano counts based on Hildreth et al. (2014), Bursik and Gillespie (1993); Denham and Cox (1971).
					0.009325	8.3e-05	14C	Browne et al. (2010)		Red Cones. Charcoal in glacial sediments 2 cm below scoria.
					0.0133		14C	Denham and Cox (1971)		Black Point.
					0.0155	0.0018	40Ar/39Ar	Hildreth et al. (2014)		Basaltic trachyandesite NE of Deadman Pass
					0.0169	0.0013	40Ar/39Ar	Hildreth et al. (2014)		Basaltic trachyandesite NE of Deadman Pass
					0.031	0.001	40Ar/39Ar	HILdreth et al. (2014)		Basalt of Horseshoe Lake
					0.0338	0.001	40Ar/39Ar	Hildreth et al. (2014)		Basaltic trachyandesite south of Crestview
					0.0924	0.0025	40Ar/39Ar	Hildreth et al. (2014)		Basalt of Fish Hatchery
					0.0927	0.0024	40Ar/39Ar	Hildreth et al. (2014)		Source of basalt of Fish Hatchery
					0.1035	0.0014	40Ar/39Ar	Hildreth et al. (2014)		Basalt of Shady Rest
					0.1214	0.0021	40Ar/39Ar	Hildreth et al. (2014)		Basaltic trachyandesite of Upper Soda Springs
					0.1253	0.0019	40Ar/39Ar	Hildreth et al. (2014)		Basalt of Casa Diablo Hot Springs
					0.1296	0.0012	40Ar/39Ar	Hildreth et al. (2014)		Basaltic trachyandesite of lower Laurel Creek
					0.1542	0.0015	40Ar/39Ar	Hildreth et al. (2014)		Basaltic trachyandesite of Sawmill Cutoff
					0.1553	0.002	40Ar/39Ar	Hildreth et al. (2014)		Trachybasalt west of Deer Creek
					0.1637	0.0017	40Ar/39Ar	Hildreth et al. (2014)		Trachybasalt south of Crater Flat
					0.1649	0.0021	40Ar/39Ar	Hildreth et al. (2014)		Basalt of Shady Rest
					0.1718	0.0018	40Ar/39Ar	Hildreth et al. (2014)		Basalt of Sawmill Cutoff
					0.1746	0.0032	40Ar/39Ar	Hildreth et al. (2014)		Basaltic trachyandesite of Canyon Lodge
					0.1772	0.002	40Ar/39Ar	Hildreth et al. (2014)		Basaltic trachyandesite of Canyon Lodge
					0.1795	0.0024	40Ar/39Ar	Hildreth et al. (2014)		Basaltic trachyandesite of Canyon Lodge
					0.1859	0.0017	40Ar/39Ar	Hildreth et al. (2014)		Basaltic trachyandesite of Canyon Lodge
	Pisgah		1	1	0.023	0.001	36Cl	Phillips (2003)
					0.027		Rock varnish	Liu (2003)		Age given here is middle of range determined by Liu (2003) based upon rock varnish microstratigraphy (24-30 ka).
	Tahoe		20	0	2.3	0.05	40Ar/39Ar	Kortemeier et al., 2018		Rocky Ridge
					2.08	0.05	40Ar/39Ar	Kortemeier et al., 2018		Eagle Rock
					2.08	0.007	40Ar/39Ar	Kortemeier et al., 2018		Granlibakken
					2.09	0.006	40Ar/39Ar	Kortemeier et al., 2018		Quarry Cliffs
					0.94	0.003	40Ar/39Ar	Kortemeier et al., 2018		Thunder Cliffs cinder cone
					1.23	0.05	40Ar/39Ar	Cousens et al., 2011		Bald Mountain South
					1.44	0.03	40Ar/39Ar	Cousens et al., 2011		Bald Mountain west
					1.58	0.04	40Ar/39Ar	Cousens et al., 2011		Bald Mountain north
					2.2	0.26	40Ar/39Ar	Cousens et al., 2011		Skylandia Beach (morphologically seems <1 Ma)
					1.44	0.06	40Ar/39Ar	Cousens et al., 2011		Carson Range
					1.34	0.03	40Ar/39Ar	Cousens et al., 2011		Dry Creek area
	Ubehebe		1	1	0.00227	0.0003	10Be/Sec. Var.	Champion et al. (2018)		Age is based upon paleomagnetic analysis and re-interpretation of previous surface exposure ages.
Colorado	Dotsero		2	1	0.00415	0.0003	14C	Leat et al. (1989); age from Geigengack (1962; reported in Streufert et al., 2009)		Age is for Dotsero maar volcano.
Nevada	Buffalo Valley		12	0	0.96	0.1	40Ar/39Ar	Cousens et al. (2013)		12 is approximate number of Quaternary centers per data source.
					1.24	0.21	K-Ar	Morton et al. (1977; as cited in Cousens et al., 2013)
					1.29	0.03	K-Ar	Morton et al. (1977; as cited in Cousens et al., 2013)
					1.4	0.14	K-Ar	Morton et al. (1977; as cited in Cousens et al., 2013)
					1.77	0.15	40Ar/39Ar	Cousens et al. (2013)
	Aurora-Bodie		1	0	1.6	0.01	K-Ar	Gilbert et al. (1968)
	Clayton Valley		1	0	0.39		K-Ar	Wood and Kienle (1990)
	Lunar Crater		96	1	0.035	0.007	40Ar/39Ar	Valentine et al. (2017)		Marcath (Black Rock) volcano
					0.034	0.007	36Cl	Shepard et al. (1995)		Marcath (Black Rock) volcano
					0.044	0.011	10Be	Shepard et al. (1995)		Marcath (Black Rock) volcano
					0.072	0.004	10Be	Valentine et al. (2017)		Lunar Crater maar
					0.19	0.01	40Ar/39Ar	Valentine et al. (2017)
					0.13	0.07	40Ar/39Ar	Valentine et al. (2017)
					0.14	0.005	40Ar/39Ar	Valentine and Cortés (2013)		Easy Chair volcano
					0.19	0.01	40Ar/39Ar	Valentine et al. (2017)
					0.27	0.02	40Ar/39Ar	Valentine et al. (2017)
					0.46	0.04	40Ar/39Ar	Valentine et al. (2017)
					0.583	0.006	40Ar/39Ar	Valentine et al. (2017)
					0.624	0.005	40Ar/39Ar	Valentine et al. (2017)
					0.66	0.17	40Ar/39Ar	Dickson (1997; as cited in Valentine et al., 2017)
					0.84	0.03	40Ar/39Ar	Rasoazanamparany et al. (2015)
					0.88	0.02	40Ar/39Ar	Valentine et al. (2017)
					0.93	0.07	K-Ar	Valentine et al. (2017)
					1.05	0.04	K-Ar	Valentine et al. (2017)
					1.09	0.08	K-Ar	Valentine et al. (2017)
	Sheldon-Antelope		4	0				Wood and Kienle (1990)
	Soda Lakes-Rattlesnake Hill-Upsal Hogback		3		0.91	0.04	40Ar/39Ar	Cousens et al. (2012)		Rattlesnake Hill
	Southwest Nevada		8	0	0.077	0.006	40Ar/39Ar	Heizler et al. (1999)		Lathrop Wells Cone
					0.077	0.005	40Ar/39Ar	Heizler et al. (1999)		Lathrop Wells Cone
					0.172	0.057	40Ar/39Ar	Turrin and Champion (1991)		Lathrop Wells Cone
					0.142	0.038	40Ar/39Ar	Turrin and Champion (1991)		Lathrop Wells Cone
					0.083	0.005	3He	Poths et al. (1994)		Lathrop Wells Cone
					0.084	0.008	3He	Poths et al. (1994)		Lathrop Wells Cone
					0.081	0.008	36Cl	Zreda et al. (1993)		Lathrop Wells Cone
					0.327	0.028	K-Ar	Fleck et al. (1996)		Little Black Peak.
					0.389	0.068	K-Ar	Fleck et al. (1996)		Little Black Peak.
					0.174	0.156	K-Ar	Fleck et al. (1996)		Little Black Peak.
					0.189	0.101	K-Ar	Fleck et al. (1996)		Little Black Peak.
					0.399	0.091	K-Ar	Fleck et al. (1996)		Hidden Cone.
					0.366	0.074	K-Ar	Fleck et al. (1996)		Hidden Cone.
					0.434	0.113	K-Ar	Fleck et al. (1996)		Hidden Cone.
					0.339	0.072	K-Ar	Fleck et al. (1996)		Hidden Cone.
					1.069	0.054	K-Ar	Fleck et al. (1996)		Black Cone.
					1.063	0.052	K-Ar	Fleck et al. (1996)		Black Cone.
					0.817	0.072	K-Ar	Fleck et al. (1996)		Black Cone.
					0.791	0.092	K-Ar	Fleck et al. (1996)		Black Cone.
					1.034	0.062	K-Ar	Fleck et al. (1996)		Black Cone.
					0.91	0.074	K-Ar	Fleck et al. (1996)		Black Cone.
					0.841	0.117	K-Ar	Fleck et al. (1996)		Red Cone.
					1.094	0.199	K-Ar	Fleck et al. (1996)		Red Cone.
					0.965	0.064	K-Ar	Fleck et al. (1996)		Red Cone.
					0.932	0.098	K-Ar	Fleck et al. (1996)		Red Cone.
					0.97	0.035	K-Ar	Fleck et al. (1996)		Red Cone.
					1.085	0.16	K-Ar	Fleck et al. (1996)		Red Cone.
					1.11	0.092	K-Ar	Fleck et al. (1996)		Red Cone.
					1.042	0.045	K-Ar	Fleck et al. (1996)		Little Cones.
					1.086	0.032	K-Ar	Fleck et al. (1996)		Northernmost Cone.
					1.056	0.045	K-Ar	Fleck et al. (1996)		Northernmost Cone.
New Mexico	Albuquerque (incl. Cat Hills area)		4	0	0.155	0.094	K-Ar	Geissman et al. (1990, as reported in Singer et al., 2008); Maldonado et al. (2006)		Albuquerque volcanoes
					0.195	0.04	K-Ar	Bachman and Mehnert (1978; as reported in Dunbar, 2005)		Albuquerque volcanoes
					0.156	0.029	238U-230Th	Peate et al. (1996, as reported in Singer et al., 2008)		Albuquerque volcanoes
					0.212	0.159	40Ar/39Ar	Singer et al. (2008)		Albuquerque volcanoes
					0.232	0.12	40Ar/39Ar	Singer et al. (2008)		Albuquerque volcanoes
					0.225	0.023	40Ar/39Ar	Singer et al. (2008)		Albuquerque volcanoes
					0.236	0.025	40Ar/39Ar	Singer et al. (2008)		Albuquerque volcanoes
					0.16	0.052	40Ar/39Ar	Singer et al. (2008)		Albuquerque volcanoes
					0.218	0.014	40Ar/39Ar	Singer et al. (2008)		Albuquerque volcanoes
					0.144	0.038	K-Ar	Kudo et al. (1977; as reported in Dunbar, 2005)		Cat Hills
					0.098	0.002	40Ar/39Ar	Maldonado et al. (2006)		Cat Hills
					0.11	0.03	40Ar/39Ar	Maldonado et al. (2006)		Cat Hills
					0.14	0.038	K-Ar	Maldonado et al. (2006)		Cat Hills
					1.25	0.02	40Ar/39Ar	Dunbar (2005)		Los Lunas Volcano Phase 2
	Carrizozo		3	1	0.0052	0.0007	36Cl	Dunbar (2005)		Carrizozo flows (Valley of Fires)
					0.0043	0.001	3He	Dunbar (2005)		Carrizozo flows (Valley of Fires)
					0.78	0.1	K-Ar	Bachman and Mehnert (1978; as reported in Dunbar, 2005)		Jornada del Muerto flow
	Cerros del Rio		23	0	2.45	0.006	40Ar/39Ar	Woldegabriel et al. (1996)
					2.5	0.04	40Ar/39Ar	Woldegabriel et al. (1996)
					2.33	0.08	40Ar/39Ar	Woldegabriel et al. (1996)
					2.51	0.14	40Ar/39Ar	Woldegabriel et al. (1996)
					2.54	0.02	40Ar/39Ar	Woldegabriel et al. (1996)
					2.48	0.06	40Ar/39Ar	Woldegabriel et al. (1996)
					2.45	0.06	40Ar/39Ar	Woldegabriel et al. (1996)
					2.46	0.02	40Ar/39Ar	Woldegabriel et al. (1996)
					2.57	0.02	40Ar/39Ar	Woldegabriel et al. (1996)
					2.55	0.02	40Ar/39Ar	Woldegabriel et al. (1996)
					2.5	0.02	40Ar/39Ar	Woldegabriel et al. (1996)
					2.46	0.03	40Ar/39Ar	Woldegabriel et al. (1996)
					2.54	0.06	40Ar/39Ar	Woldegabriel et al. (1996)
					2.39	0.08	40Ar/39Ar	Woldegabriel et al. (1996)
					2.49	0.03	40Ar/39Ar	Woldegabriel et al. (1996)
					2.55	0.06	40Ar/39Ar	Kelley et al. (2013)
					2.4	0.22	40Ar/39Ar	Kelley et al. (2013)
					2.49	0.05	40Ar/39Ar	Kelley et al. (2013)
					2.5	0.03	40Ar/39Ar	Kelley et al. (2013)
					2.52	0.18	40Ar/39Ar	Kelley et al. (2013)
					2.46	0.22	40Ar/39Ar	Kelley et al. (2013)		Santa Ana Mesa
					2.57	0.03	40Ar/39Ar	Kelley et al. (2013)		Santa Ana Mesa
					2.57	0.02	40Ar/39Ar	Kelley et al. (2013)		Santa Ana Mesa
					2.41	0.03	40Ar/39Ar	Kelley et al. (2013)		Santa Ana Mesa
	Lucero		6	0	0.278	0.302	K-Ar	Dunbar (2005)		Cerro Verde flow (also called Suwanee flow)
					0.328	0.2	K-Ar	Bachman and Mehnert (1978; as reported in Dunbar, 2005)		Cerro Verde flow (also called Suwanee flow)
					0.184	0.01	40Ar/39Ar	Channer et al. (2015)		Cerro Verde flow (also called Suwanee flow)
					0.5	0.1	K-Ar	Baldridge et al. (1987; as reported in Dunbar, 2005)		Badger Butte
					0.7	0.1	K-Ar	Baldridge et al. (1987; as reported in Dunbar, 2005)		Mush Mountain
					0.672	0.004	40Ar/39Ar	Channer et al. (2015)		Suwanee flow
					0.789	0.009	40Ar/39Ar	Channer et al. (2015)		Suwanee flow
					0.8	0.1	K-Ar	Baldridge et al. (1987; as reported in Dunbar, 2005)		Volcano Hill flow
	Mount Taylor		58	0	1.26	0.19	40Ar/39Ar	Goff et al. (2019)		Cerro Pelón. Volcano count is a minimum, based upon map units of Goff et al. (2019) and two centers dated by Channer et al. (2015); does not include northern part of volcanic field.
					1.52	0.18	K-Ar	Crumpler (1982; as reported in Dunbar, 2005)
					1.53	0.04	40Ar/39Ar	Goff et al. (2019)
					1.56	0.17	K-Ar	Lipman and Mehnert (1978; as reported in Dunbar, 2005)
					1.64	0.04	40Ar/39Ar	Goff et al. (2019)
					1.73	0.02	40Ar/39Ar	Goff et al. (2019)
					1.74	0.03	40Ar/39Ar	Goff et al. (2019)
					1.76	0.05	40Ar/39Ar	Goff et al. (2019)
					1.79	0.05	40Ar/39Ar	Goff et al. (2019)
					1.8	0.01	40Ar/39Ar	Goff et al. (2019)
					1.85	0.06	40Ar/39Ar	Goff et al. (2019)
					1.888	0.012	40Ar/39Ar	Channer et al. (2015)		Flower Mountain
					1.9	0.03	40Ar/39Ar	Goff et al. (2019)
					2.05	0.13	40Ar/39Ar	Hallett et al. (1997)		Mesa Prieta
					2.114	0.012	40Ar/39Ar	Channer et al. (2015)		Wheat Mountain
					2.13	0.01	40Ar/39Ar	Goff et al. (2019)
					2.14	0.02	40Ar/39Ar	Goff et al. (2019)
					2.18	0.06	40Ar/39Ar	Goff et al. (2019)
					2.18	0.02	40Ar/39Ar	Goff et al. (2019)
					2.2	0.3	K-Ar	Armstrong et al. (1976; as reported in Hallett et al., 1997)		Mesa Prieta
					2.22	0.06	40Ar/39Ar	Goff et al. (2019)
					2.25	0.01	40Ar/39Ar	Goff et al. (2019)
					2.27	0.01	40Ar/39Ar	Goff et al. (2019)
					2.28	0.07	40Ar/39Ar	Goff et al. (2019)
					2.29	0.06	40Ar/39Ar	Goff et al. (2019)
					2.3	0.13	40Ar/39Ar	Goff et al. (2019)
					2.31	0.06	40Ar/39Ar	Goff et al. (2019)
					2.32	0.01	40Ar/39Ar	Goff et al. (2019)
					2.35	0.03	40Ar/39Ar	Goff et al. (2019)
					2.36	0.3	40Ar/39Ar	Hallett et al. (1997)		Mesa Prieta
					2.37	0.14	40Ar/39Ar	Goff et al. (2019)
					2.4	0.3	40Ar/39Ar	Hallett et al. (1997)		Cerro de Guadelupe
					2.41	0.02	40Ar/39Ar	Goff et al. (2019)
					2.44	0.01	40Ar/39Ar	Goff et al. (2019)
					2.49	0.06	40Ar/39Ar	Goff et al. (2019)
					2.52	0.01	40Ar/39Ar	Goff et al. (2019)
					2.56	0.02	40Ar/39Ar	Hallett et al. (1997)		Cerro de Nuestra Señora
					2.57	0.02	40Ar/39Ar	Hallett et al. (1997)		Cerro de la Celosa
	Ocate		14	0	0.81	0.14	K-Ar	O'Niell and Mehnert (1988, as reported in Olmstead and McIntosh, 2004)		Cerro del Oro
					1.37	0.15	K-Ar	O'Niell and Mehnert (1988, as reported in Dunbar, 2005)		Maxson Crater
					1.54	0.07	40Ar/39Ar	Olmstead and McIntosh (2004)		Maxson Crater
					1.56	0.02	40Ar/39Ar	Olmstead and McIntosh (2004)		Maxson Crater
					1.56	0.06	40Ar/39Ar	Olmstead and McIntosh (2004)		Maxson Crater
					1.57	0.04	40Ar/39Ar	Olmstead and McIntosh (2004)		Maxson Crater
					1.57	0.06	40Ar/39Ar	Olmstead and McIntosh (2004)		Maxson Crater
					1.58	0.16	40Ar/39Ar	Olmstead and McIntosh (2004)		Maxson Crater
					1.59	0.15	40Ar/39Ar	Olmstead and McIntosh (2004)		Maxson Crater
					1.64	0.05	40Ar/39Ar	Olmstead and McIntosh (2004)		Maxson Crater
					1.8	0.02	40Ar/39Ar	Olmstead and McIntosh (2004)
					1.96	0.03	40Ar/39Ar	Olmstead and McIntosh (2004)
					1.97	0.04	40Ar/39Ar	Olmstead and McIntosh (2004)
					2.11	0.02	40Ar/39Ar	Olmstead and McIntosh (2004)		Cerro Pelon
					2.13	0.05	40Ar/39Ar	Olmstead and McIntosh (2004)		Cerro Pelon
					2.18	0.04	40Ar/39Ar	Olmstead and McIntosh (2004)		Cerro Pelon
					2.2	0.02	40Ar/39Ar	Olmstead and McIntosh (2004)
					2.27	0.03	40Ar/39Ar	Olmstead and McIntosh (2004)		Cerro Pelon
					2.28	0.03	40Ar/39Ar	Olmstead and McIntosh (2004)		Cerrito Pelon
					2.35	0.02	40Ar/39Ar	Olmstead and McIntosh (2004)		Cerrito Pelon
					2.31	0.05	40Ar/39Ar	Olmstead and McIntosh (2004)
					2.36	0.14	40Ar/39Ar	Olmstead and McIntosh (2004)
					2.51	0.09	40Ar/39Ar	Olmstead and McIntosh (2004)
	Potrillo		124	6	0.0082	0.00022	36Cl	Leavy (1987, as reported in Dunbar, 2005)
					0.0108	0.0007	36Cl	Leavy(1987, as reported in Dunbar, 2005)
					0.016	0.007	3He	Williams and Poths (1994, as reported in Dunbar, 2005)		Hunt's Hole
					0.022	0.004	3He	Williams and Poths (1994, as reported in Dunbar, 2005)		Aden Crater
					0.024		soil	Gile (1987, as reported in Dunbar, 2005)		Kilbourne Hole
					0.028		3He	Williams (1999, as reported in Dunbar, 2005)		Kilbourne Hole
					0.0444	0.0037	36Cl	Leavy (1987, as reported in Dunbar, 2005)
					0.07	0.006	3He	Williams and Poths (1994, as reported in Dunbar, 2005)
					0.079	0.007	3He	Williams and Poths (1994, as reported in Dunbar, 2005)
					0.082	0.006	3He	Williams and Poths (1994, as reported in Dunbar, 2005)
					0.098	0.005	3He	Williams and Poths (1994, as reported in Dunbar, 2005)
					0.103	0.005	3He	Williams and Poths (1994, as reported in Dunbar, 2005)
					0.114	0.007	3He	Williams and Poths (1994, as reported in Dunbar, 2005)
					0.117	0.009	3He	Williams and Poths (1994, as reported in Dunbar, 2005)
					0.1603	0.0016	36Cl	Leavy (1987, as reported in Dunbar, 2005)
					0.18	0.03	K-Ar	Seager et al. (1984, as reported in Dunbar, 2005)
					0.2508	0.0224	36Cl	Leavy (1987, as reported in Dunbar, 2005)
					0.49	0.03	K-Ar	Seager et al. (1984, as reported in Dunbar, 2005)
					0.53	0.03	K-Ar	Seager et al. (1984, as reported in Dunbar, 2005)
					0.53	0.04	K-Ar	Seager et al. (1984, as reported in Dunbar, 2005)
					0.544	0.05	K-Ar	Lynch (1978, as reported in Dunbar, 2005)
					0.55	0.03	K-Ar	Seager et al. (1984, as reported in Dunbar, 2005)
					1.2	0.06	K-Ar	Seager et al. (1984, as reported in Dunbar, 2005)
	Red Hill-Quemado		12	1	0.010935	0.00098	OSL	McIntosh and Cather (1994); Onken and Forman (2017)		Quaternary volcano count based upon dated units. Age - Zuni Salt Lake (maar). Lacustrine deposits in Zuni Salt Lake crater, minimum age of crater.
					0.01025	0.000765	OSL	Onken and Forman (2017)		Zuni Salt Lake (maar). Tephra ring deposits.
					0.01042	0.000765	OSL	Onken and Forman (2017)		Zuni Salt Lake (maar). Top of pre-Zuni Salt Lake ash overlain by Zuni Salt Lake tephra ring deposits.
					0.01252	0.00086	OSL	Onken and Forman (2017)		Zuni Salt Lake (maar). Sandstone just beneath contact with Zuni Salt Lake lava.
					0.01291	0.00835	OSL	Onken and Forman (2017)		Zuni Salt Lake (maar). Sandstone just beneath contact with Zuni Salt Lake lava.
					0.01194	0.00022	14C	Onken and Forman (2017)		Zuni Salt Lake (maar). Charred wood 6 cm below basal contact of tephra ring deposits. Calibrated age, 2-sigma error.
					0.01219	0.0002	14C	Onken and Forman (2017)		Zuni Salt Lake (maar). Charred wood 1 cm below basal contact of tephra ring deposits. Calibrated age, 2-sigma error.
					0.086	0.031	40Ar/39Ar	McIntosh and Cather (1994)		Zuni Salt Lake (maar). "Ring intrusive."
					0.114	0.038	40Ar/39Ar	McIntosh and Cather (1994)		Zuni Salt Lake (maar). Bomb.
					0.013445	0.000115	14C	Onken and Forman (2017)		Cerro Pomo. Charred wood 1-4 cm below basal contact of tephra fall deposit. Calibrated age, 2-sigma error.
					0.5	0.19	K-Ar	Minier et al. (1988, as reported in Dunbar, 2005)		Cerro Pomo lava.
					0.071	0.012	40Ar/39Ar	McIntosh and Cather (1994)		Red Hill
					0.206	0.034	40Ar/39Ar	McIntosh and Cather (1994)
					0.97	0.014	40Ar/39Ar	Mcintosh and Cather (1994)
					1.35	0.21	K-Ar	Minier et al. (1988, as reported in Dunbar, 2005)
					1.51	0.01	40Ar/39Ar	McIntosh and Cather (1994)
					1.55	0.01	40Ar/39Ar	McIntosh and Cather (1994)
					1.95	0.05	40Ar/39Ar	McIntosh and Cather (1994)
					2.05	0.02	40Ar/39Ar	McIntosh and Cather (1994)
					2.37	0.03	40Ar/39Ar	McIntosh and Cather (1994)
					2.46	0.04	40Ar/39Ar	McIntosh and Cather (1994)
	Raton-Clayton		28	3	0.0364	0.0081	40Ar/39Ar	Zimmerer (2019)		Purvine Hills
					0.0326	0.0061	40Ar/39Ar	Zimmerer (2019)		Purvine Hills
					0.0427	0.0075	40Ar/39Ar	Zimmerer (2019)		Purvine Hills
					0.52	0.02	40Ar/39Ar	Stroud (1997; as reported in Nereson et al., 2013)		Purvine Hills
					0.0426	0.0114	40Ar/39Ar	Zimmerer (2019)		Twin Mountain
					0.0364	0.0028	40Ar/39Ar	Zimmerer (2019)		Twin Mountain
					0.0374	0.0042	40Ar/39Ar	Zimmerer (2019)		Twin Mountain
					0.048	0.014	40Ar/39Ar	Stroud (1997; as reported in Nereson et al., 2013)		Twin Mountain
					0.0517	0.099	40Ar/39Ar	Zimmerer (2019)		Baby Capulin
					0.0482	0.0085	40Ar/39Ar	Zimmerer (2019)		Baby Capulin
					0.0431	0.0029	40Ar/39Ar	Zimmerer (2019)		Baby Capulin
					0.0459	0.0029	40Ar/39Ar	Zimmerer (2019)		Baby Capulin
					0.034	0.019	40Ar/39Ar	Stroud (1997; as reported in Nereson et al., 2013)		Capulin
					0.05	0.03	40Ar/39Ar	Stroud (1997; as reported in Nereson et al., 2013)		Capulin
					0.065	0.049	40Ar/39Ar	Stroud (1997; as reported in Nereson et al., 2013)		Capulin
					0.0542	0.0048	40Ar/39Ar	Zimmerer (2019)		Capulin
					0.0542	0.0019	40Ar/39Ar	Zimmerer (2019)		Capulin
					0.056	0.008	40Ar/39Ar	Stroud (1997; as reported in Nereson et al., 2013)		Capulin
					0.059	0.006	3He	Sayre et al. (1995)		Capulin
					0.0642	0.0023	40Ar/39Ar	Zimmerer (2019)		Malpie Mtn.
					0.0614	0.0007	40Ar/39Ar	Zimmerer (2019)		Malpie Mtn.
					0.0606	0.0192	40Ar/39Ar	Zimmerer (2019)		Malpie Mtn.
					0.1016	0.0049	40Ar/39Ar	Zimmerer (2019)		The Crater
					0.0961	0.0032	40Ar/39Ar	Stroud (1997; as reported in Nereson et al., 2013)		The Crater
					0.124	0.03	40Ar/39Ar	Zimmerer (2019)		The Crater
					0.1171	0.0105	40Ar/39Ar	Zimmerer (2019)		Trinchera Pass
					0.1107	0.0066	40Ar/39Ar	Zimmerer (2019)		Trinchera Pass
					0.13	0.05	40Ar/39Ar	Stroud (1997; as reported in Nereson et al., 2013)		Trinchera center
					0.225	0.058	40Ar/39Ar	Stroud (1997; as reported in Nereson et al., 2013)		Third Capulin flow
					0.2422	0.0077	40Ar/39Ar	Zimmerer (2019)		Horseshoe Crater
					0.2389	0.0164	40Ar/39Ar	Zimmerer (2019)		Horseshoe Crater
					0.2325	0.009	40Ar/39Ar	Zimmerer (2019)		Horseshoe Crater
					0.44	0.08	40Ar/39Ar	Stroud (1997; as reported in Nereson et al., 2013)		Horseshoe Crater
					0.3703	0.0093	40Ar/39Ar	Zimmerer (2019)		Las Maestas
					0.3716	0.0129	40Ar/39Ar	Zimmerer (2019)		Las Maestas
					0.3578	0.0153	40Ar/39Ar	Zimmerer (2019)		Las Maestas
					0.64	0.14	40Ar/39Ar	Stroud (1997; as reported in Nereson et al., 2013)		Las Maestas
					0.73	0.06	40Ar/39Ar	Stroud (1997; as reported in Nereson et al., 2013)		Blosser Mesa flow
					0.98	0.01	40Ar/39Ar	Stroud (1997; as reported in Nereson et al., 2013)		Eagle Trail Mountain flow
					1.05	0.19	40Ar/39Ar	Stroud (1997; as reported in Nereson et al., 2013)		Highway 193 cone
					1.14	0.13	40Ar/39Ar	Stroud (1997; as reported in Nereson et al., 2013)		Chaco Arroyo flow
					1.14	0.12	40Ar/39Ar	Stroud (1997; as reported in Nereson et al., 2013)		Red Mountain flow, older
					1.28	0.06	40Ar/39Ar	Stroud (1997; as reported in Nereson et al., 2013)		Red Mountain flow, younger
					1.25	0.07	40Ar/39Ar	Stroud (1997; as reported in Nereson et al., 2013)		Blosser Mesa cone
					1.43	0.11	40Ar/39Ar	Stroud (1997; as reported in Nereson et al., 2013)		Carr Mountain flow
					1.46	0.36	40Ar/39Ar	Stroud (1997; as reported in Nereson et al., 2013)		Tripod Mountain
					1.692	0.0324	40Ar/39Ar	Zimmerer (2019)		Mud Hill
					2.18	0.12	40Ar/39Ar	Stroud (1997; as reported in Nereson et al., 2013)		Cow Mountain flow
					2.24	0.06	40Ar/39Ar	Stroud (1997; as reported in Nereson et al., 2013)		Mount Dora flow
					2.3	0.2	40Ar/39Ar	Stroud (1997; as reported in Nereson et al., 2013)		Mount Clayton flow
					2.26	0.12	40Ar/39Ar	Stroud (1997; as reported in Nereson et al., 2013)		Clayton flow
					2.35	0.06	40Ar/39Ar	Stroud (1997; as reported in Nereson et al., 2013)		Clayton flow
					2.44	0.08	40Ar/39Ar	Stroud (1997; as reported in Nereson et al., 2013)		Clayton flow
					2.31	0.33	40Ar/39Ar	Stroud (1997; as reported in Nereson et al., 2013)		Rabbit Ears flow
					2.58	0.28	40Ar/39Ar	Stroud (1997; as reported in Nereson et al., 2013)		Upper Folsom Falls flow
	Taos Plateau		6	0	0.25	0.06	K-Ar	Lipman and Mehnert (1979; as reported in Dunbar, 2005)		Tierra Amarilla flow
					0.25	0.14	K-Ar	Lipman and Mehnert (1979; as reported in Dunbar, 2005)		Upper Brazos Canyon flow
					0.81	0.05	K-Ar	Scott and Marvin (1985; as reported in Dunbar, 2005)
					0.96	0.03	K-Ar	Scott and Marvin (1985; as reported in Dunbar, 2005)
					1.1	0.04	K-Ar	Scott and Marvin (1985; as reported in Dunbar, 2005)
					1.03	0.01	40Ar/39Ar	Appelt (1998; as reported in Dunbar, 2005)		Mesita cone (southern Colorado)
	Zuni-Bandera		16	8	0.0039	0.0012	36Cl	Dunbar (2005); Dunbar and Phillips (2004)		Vent count based on geologic map of Dunbar and Phillips (2004) and total dated Quaternary centers listed here. Age is for McCartys flow.
					0.0032	0.001	14C	Laughlin et al. (1994)		McCartys flow
					0.0025	0.0012	3He	Laughlin et al. (1994)		McCartys flow
					0.009	0.0007	U-series	Polyak et al. (2020)		Bandera flow (lava cave gypsum)
					0.0112	0.006	36Cl	Dunbar and Phillips (2004)		Bandera flow
					0.0116	0.0666	14C	Laughlin et al. (1994)		Bandera flow
					0.0112	0.0011	3He	Laughlin et al. (1994)		Bandera flow
					0.015	0.001	36Cl	Dunbar and Phillips (2004)		Paxton Springs south flow
					0.018	0.001	36Cl	Dunbar and Phillips (2004)		Twin Craters flow
					0.0169	0.009	U-series	Polyak et al. (2020)		Hoya de Cibola
					0.0169	0.019	14C	Laughlin and WoldeGabriel (1997; as reported in Dunbar, 2005)		Twin Craters flow
					0.0199	0.0015	U-series	Polyak et al. (2020)		Twin Craters flow (also La Tetera; lava cave gypsum)
					0.0207	0.0022	36Cl	Dunbar and Phillips (2004)		Paxton Springs north flow
					0.054	0.05	K-Ar	Laughlin et al. (1993; as reported in Dunbar, 2005)		Laguna flow
					0.0362	0.0032	36Cl	Dunbar and Phillips (2004)		Bluewater flow
					0.0412	0.0088	36Cl	Sims et al. (2007)		Bluewater flow
					0.0475	0.005	3He	Sims et al. (2007)		Bluewater flow
					0.057	0.006	3He	Laughlin et al. (1994)		Bluewater flow
					0.068	0.022	U-Th	Sims et al. (2007)		Bluewater flow
					0.94	0.4	K-Ar	Anders et al. (1981; as reported in Dunbar, 2005)		Cerro Brillante cone
					0.101	0.014	40Ar/39Ar	Singer et al. (2014)		El Calderon flow
					0.112	0.023	40Ar/39Ar	Singer et al. (2014)		El Calderon flow
					0.274	0.021	40Ar/39Ar	Channer et al. (2015)
					0.322	0.011	40Ar/39Ar	Channer et al. (2015)		Laguna Pueblo flow
					0.325	0.043	40Ar/39Ar	Channer et al. (2015)
					1.38	0.29	K-Ar	Crumpler (1982; as reported in Dunbar, 2005)		Fence Lake flow
					1.5	0.3	K-Ar	Anders et al. (1981; as reported in Dunbar, 2005)		Cerro Alto cone
Utah	Southwest Utah		113	1	1.98	0.04	40Ar/39Ar	Doelling (2008); Biek et al. (2010, 2015); Rowley et al. (2005)		Aqueduct Hill flow
					2.05	0.01	40Ar/39Ar	Biek et al. (2010)		Aqueduct Hill flow
					0.67	0.04	40Ar/39Ar	Biek et al. (2010)		Baker Dam flow
					0.69	0.14	40Ar/39Ar	Biek et al. (2010)		Baker Dam flow
					1.113	0.05	40Ar/39Ar	Biek et al. (2010)		Big Sand
					1.07	0.04	K-Ar	Hamblin et al. (1981; as reported in Biek et al., 2010)		Cedar Bench flow
					1.23	0.01	40Ar/39Ar	Biek et al. (2010)		Cedar Bench flow
					1.23	0.01	40Ar/39Ar	Biek et al. (2010)		Cedar Bench flow
					1.16	0.03	40Ar/39Ar	Biek et al. (2010)		Cedar Bench flow
					1.77	0.09	40Ar/39Ar	Biek et al. (2010)		Central West flow
					0.92	0.07	40Ar/39Ar	Biek et al. (2010)		Central West flow
					0.65	0.08	40Ar/39Ar	Biek et al. (2010)		Cinder cone NE of Veyo
					0.24	0.02	40Ar/39Ar	Biek et al. (2010)		Cinder pits flow
					0.31	0.07	40Ar/39Ar	Biek et al. (2010)		Crater Hill flow
					0.32	0.13	40Ar/39Ar	Biek et al. (2010)		Crater Hill flow
					0.28	0.08	40Ar/39Ar	Biek et al. (2010)		Crater Hill flow
					0.59	0.02	40Ar/39Ar	Biek et al. (2010)		Dameron Valley east flow
					0.41	0.08	40Ar/39Ar	Biek et al. (2010)		Divide flow
					0.278	0.0018	40Ar/39Ar	Downing (2000; as reported in Biek et al., 2010)		Gould Wash flow
					0.42	0.21	40Ar/39Ar	Biek et al. (2010)		Gould Wash flow
					1.5	0.2	K-Ar	Best et al. (1980; as reported in Biek et al., 2010)		Granite Wash flow
					2.03	0.2	40Ar/39Ar	Biek et al. (2010)		Granite Wash flow
					0.22	0.03	40Ar/39Ar	Biek et al. (2010)		Grapevine Wash flow
					0.29	0.02	40Ar/39Ar	Biek et al. (2010)		Grapevine Wash flow
					0.31	0.04	40Ar/39Ar	Biek et al. (2010)		Grapevine Wash flow
					0.26	0.01	40Ar/39Ar	Biek et al. (2010)		Grapevine Wash flow
					0.26	0.03	40Ar/39Ar	Biek et al. (2010)		Grapevine Wash flow
					0.26	0.09	K-Ar	Best et al. (1980; as reported in Biek et al., 2010)		Grapevine Wash flow
					1.02	0.36	40Ar/39Ar	Biek et al. (2010)		Grass Knoll flow
					1.09	0.09	40Ar/39Ar	Biek et al. (2010)		Grass Valley flow
					1.62	0.02	40Ar/39Ar	Biek et al. (2010)		Gunlock flow
					1.6	0.11	K-Ar	Hintze et al. (1994; as reported in Biek et al., 2010)		Gunlock flow
					1.65	0.02	40Ar/39Ar	Biek et al. (2010)		Gunlock flow
					1.61	0.07	40Ar/39Ar	Biek et al. (2010)		Gunlock flow
					0.76	0.02	40Ar/39Ar	Biek et al. (2010)		Hornet Point flow
					1.2	0.6	K-Ar	Best et al. (1980; as reported in Biek et al., 2010)		Hornet Point flow
					0.73	0.02	40Ar/39Ar	Biek et al. (2010)		Horse Knoll flow
					0.81	0.5	K-Ar	Best et al. (1980; as reported in Biek et al., 2010)		Horse Knoll flow
					1.03	0.06	40Ar/39Ar	Biek et al. (2010)		Horse Ranch Mountain flow
					1.03	0.1	40Ar/39Ar	Biek et al. (2010)		Horse Ranch Mountain flow
					0.97	0.07	40Ar/39Ar	Biek et al. (2010)		Ivans Knoll flow
					1.03	0.02	40Ar/39Ar	Biek et al. (2010)		Ivans Knoll flow
					1.06	0.16	40Ar/39Ar	Biek et al. (2010)		Ivans Knoll flow
					1.05	0.05	40Ar/39Ar	Biek et al. (2010)		Kolob Peak flow
					1.13	0.05	K-Ar	Best et al. (1980; as reported in Biek et al., 2010)		Kolob Peak flow
					0.56	0.06	K-Ar	Best et al. (1980; as reported in Biek et al., 2010)		Lark Canyon flow
					0.61	0.04	40Ar/39Ar	Biek et al. (2010)		Lark Canyon flow
					1	0.1	K-Ar	Best et al. (1980; as reported in Biek et al., 2010)		Lava Point flow
					1.02	0.03	40Ar/39Ar	Biek et al. (2010)		Lava Point flow
					1.08	0.02	40Ar/39Ar	Biek et al. (2010)		Lava Point flow
					1.06	0.01	40Ar/39Ar	Biek et al. (2010)		Lava Point flow
					1.1	0.08	K-Ar	Hamblin et al. (1981; as reported in Biek et al., 2010)		Lava Point flow
					1.14	0.16	40Ar/39Ar	Biek et al. (2010)		Lava Point flow
					1.6	0.4	K-Ar	Best et al. (1980; as reported in Biek et al., 2010)		Lava Point flow
					1.41	0.01	40Ar/39Ar	Biek et al. (2010)		Lava Ridge flow
					1.5	0.1	K-Ar	Best et al. (1980; as reported in Biek et al., 2010)		Lava Ridge flow
					0.345	0.015	40Ar/39Ar	Downing (2000; as reported in Biek et al., 2010)		Little Creek flow
					1.44	0.04	40Ar/39Ar	Biek et al. (2010)		Little Creek Peak flow
					0.98	0.03	40Ar/39Ar	Biek et al. (2010)		Magotsu Creek flow
					1	0.09	40Ar/39Ar	Biek et al. (2010)		Magotsu Creek flow
					1.1	0.1	K-Ar	Best et al. (1980; as reported in Biek et al., 2010)		Magotsu Creek flow
					1.2	0.1	K-Ar	Best et al. (1980; as reported in Biek et al., 2010)		Mahogany Knoll flow
					0.67	0.07	40Ar/39Ar	Biek et al. (2010)		Pine Valley flow
					1.08	0.13	40Ar/39Ar	Biek et al. (2010)		Pine Valley flow
					0.89	0.02	40Ar/39Ar	Biek et al. (2010)		Pintura flow
					0.88	0.05	40Ar/39Ar	Biek et al. (2010)		Pintura flow
					0.84	0.03	40Ar/39Ar	Biek et al. (2010)		Pintura flow
					0.81	0.1	40Ar/39Ar	Biek et al. (2010)		Pintura flow
					0.87	0.04	40Ar/39Ar	Biek et al. (2010)		Pintura flow
					1	0.1	K-Ar	Best et al. (1980; as reported in Biek et al., 2010)		Pintura flow
					0.14	0.06	40Ar/39Ar	Biek et al. (2010)		Radio Tower flow
					0.45	0.86	40Ar/39Ar	Biek et al. (2010)		Red Knoll flow
					1.06	0.03	40Ar/39Ar	Biek et al. (2010)		Remnants flow
					0.94	0.04	40Ar/39Ar	Biek et al. (2010)		Remnants flow
					1.47	0.34	40Ar/39Ar	Biek et al. (2010)		Remnants flow
					0.0273	0.0003	14C	Biek et al. (2010)		Santa Clara flow
					2.24	0.11	K-Ar	Hamblin et al. (1981; as reported in Biek et al., 2010)		Twin Peaks flow
					2.3	0.1	K-Ar	Best et al. (1980; as reported in Biek et al., 2010)		Twin Peaks flow
					2.43	0.02	40Ar/39Ar	Biek et al. (2010)		Twin Peaks flow
					2.37	0.02	40Ar/39Ar	Biek et al. (2010)		Twin Peaks flow
					2.34	0.02	40Ar/39Ar	Biek et al. (2010)		Twin Peaks flow
					0.69	0.04	40Ar/39Ar	Biek et al. (2010)		Veyo flow
					0.37	0.02	40Ar/39Ar	Biek et al. (2010)		Virgin Flats flow
					0.34	0.03	40Ar/39Ar	Biek et al. (2010)		Volcano Knoll flow
					0.36	0.8	K-Ar	Best et al. (1980; as reported in Biek et al., 2010)		Volcano Knoll flow
					0.258	0.024	40Ar/39Ar	Sanchez (1995; as reported in Biek et al., 2010)		Volcano Mountain flow
					0.27	0.05	40Ar/39Ar	Sanchez (1995; as reported in Biek et al., 2010)		Volcano Mountain flow
					0.353	0.045	40Ar/39Ar	Sanchez (1995; as reported in Biek et al., 2010)		Volcano Mountain flow
					0.293	0.087	K-Ar	Hamblin et al. (1981; as reported in Biek et al., 2010)		Volcano Mountain flow
					0.289	0.086	K-Ar	Best et al. (1980; as reported in Biek et al., 2010)		Volcano Mountain flow
					0.303	0.3	K-Ar	Best et al. (1980; as reported in Biek et al., 2010)		Volcano Mountain flow
					1.7	0.1	K-Ar	Best et al. (1980; as reported in Biek et al., 2010)		Washington flow
					0.87	0.04	40Ar/39Ar	Biek et al. (2010)		Washington flow
					0.98	0.02	40Ar/39Ar	Biek et al. (2010)		Washington flow
					0.52	0.05	K-Ar	Best et al. (1980; as reported in Biek et al., 2015)		Asay Knoll
					0.8	0.24	K-Ar	Anderson and Mehnert (1979; as reported in Biek et al., 2015)		Black Mountain
					0.87	0.04	K-Ar	Best et al. (1980; as reported in Biek et al., 2015)		Black Mountain
					0.058	0.036	40Ar/39Ar	Biek et al. (2011; as reported in Biek et al., 2015)		Henrie Knolls
					0.6	0.25	40Ar/39Ar	Stowell (2006; as reported in Biek et al., 2015)		Long Flat flow
					1.06	0.22	K-Ar	Anderson and Mehnert (1979; as reported in Biek et al., 2015)		Pine Spring Knoll
					0.56	0.07	K-Ar	Best et al. (1980; as reported in Biek et al., 2015)		Red Canyon
					0.49	0.04	40Ar/39Ar	Lund et al. (2008; as reported in Biek et al., 2015)		Red Canyon
					0.51	0.01	40Ar/39Ar	Lund et al. (2008; as reported in Biek et al., 2015)		Red Canyon
					1.28	0.4	K-Ar	Anderson and Mehnert (1979; as reported in Biek et al., 2015)		Red Hills
					0.91	0.14	K-Ar	Anderson and Mehnert (1979; as reported in Biek et al., 2015)		Summit
					1	0.16	K-Ar	Anderson and Mehnert (1979; as reported in Biek et al., 2015)		Summit
					0.45	0.04	K-Ar	Fleck et al. (1975; as reported in Biek et al., 2015)		Water Canyon
					0.63	0.1	K-Ar	Lund et al. (2008; as reported in Biek et al., 2015)		Wood Knoll
	Black Rock Desert		15	3	1	0.3	K-Ar	Best et al. (1980); Rowley et al. (2005)		Crater Knoll flow
					1.1	0.1	K-Ar	Best et al. (1980); Rowley et al. (2005)		Cunningham Hill flow
					0.0094	0.0013	36Cl	Patzkowsky et al. (2017)		Ice Springs
					0.0109	0.0016	36Cl	Patzkowsky et al. (2017)		Ice Springs
					0.0113	0.0015	36Cl	Patzkowsky et al. (2017)		Ice Springs
					0.01413	0.0001	14C	Oviatt and Nash (1989; as reported in Hintz, 2008)		Pahvant Butte
					0.0159	0.00029	14C	Best et al. (1980; as reported in Hintz, 2008)		Pahvant Butte
					0.01432	9e-05	14C	Oviatt (1991; as reported in Hintz, 2008)		Tabernacle Hill
					0.031	0.069	K-Ar	Hoover (1974; as reported in Hintz, 2008)		Pahvant lavas
					0.032	0.051	K-Ar	Hoover (1974; as reported in Hintz, 2008)		Pahvant lavas
					0.122	0.108	K-Ar	Hoover (1974; as reported in Hintz, 2008)		Pahvant lavas
					0.16	0.16	K-Ar	Best et al. (1980; as reported in Hintz, 2008)		Pahvant lavas
					0.18	0.18	K-Ar	Best et al. (1980; as reported in Hintz, 2008)		Pahvant lavas
					0.31	0.08	K-Ar	Turley and Nash (1980; as reported in Hintz, 2008)		Smelter Knolls
					0.4	0.4	K-Ar	Best et al. (1980; as reported in Hintz, 2008)		Deseret
					0.5	0.1	K-Ar	Best et al. (1980; as reported in Hintz, 2008)		Beaver Ridge
					0.875	0.08	K-Ar	Hoover (1974; as reported in Hintz, 2008)		Beaver Ridge
					0.9	0.1	K-Ar	Best et al. (1980; as reported in Hintz, 2008)		Beaver Ridge
					0.956	0.101	K-Ar	Hoover (1974; as reported in Hintz, 2008)		Beaver Ridge
					0.987	0.085	K-Ar	Hoover (1974; as reported in Hintz, 2008)		Beaver Ridge
					0.522	0.157	K-Ar	Hoover (1974; as reported in Hintz, 2008)		Beaver Ridge
					0.525	0.122	K-Ar	Hoover (1974; as reported in Hintz, 2008)		Beaver Ridge
					0.5	0.1	K-Ar	Best et al. (1980; as reported in Hintz, 2008)		Cove Fort
					0.677	0.123	K-Ar	Hoover (1974; as reported in Hintz, 2008)		Basalt of Kanosh
					1	0.3	K-Ar	Best et al. (1980; as reported in Hintz, 2008)		Black Rock flow
					1.32	0.09	K-Ar	Nash (1986; as reported in Hintz, 2008)		Black Rock flow
					2.11	0.36	K-Ar	Nash (1986; as reported in Hintz, 2008)		Burnt Mountain flow
					2.22	0.51	K-Ar	Nash (1986; as reported in Hintz, 2008)		Lava Ridge
					2.5	0.4	K-Ar	Best et al. (1980; as reported in Hintz, 2008)		Cove Creek
Wyoming	Leucite Hills		11	0	0.89	0.04	40Ar/39Ar	Lange et al. (2000)		Spring Butte (plateau age, phlogopite)
					0.89	0.02	40Ar/39Ar	Lange et al. (2000)		Spring Butte (plateau age, whole rock)
					0.91	0.03	40Ar/39Ar	Lange et al. (2000)		Deer Butte (plateau age, phlogopite)
					0.96	0.03	40Ar/39Ar	Lange et al. (2000)		Deer Butte (plateau age, whole rock)
					0.92	0.02	40Ar/39Ar	Lange et al. (2000)		Hatcher Mesa (plateau age, whole rock)
					0.95	0.05	40Ar/39Ar	Lange et al. (2000)		Zirkel Mesa (plateau age, phlogopite)
					1.1	0.11	40Ar/39Ar	Lange et al. (2000)		Zirkel Mesa (isochron age, whole rock)
					0.96	0.03	40Ar/39Ar	Lange et al. (2000)		Emmons Mesa (plateau age, whole rock)
					1.34	0.06	40Ar/39Ar	Lange et al. (2000)		Black Rock (plateau age, phlogopite)
					1.33	0.06	40Ar/39Ar	Lange et al. (2000)		Black Rock (plateau age, whole rock)
					1.47	0.06	40Ar/39Ar	Lange et al. (2000)		North Table (plateau age, phlogopite)
					1.24	0.04	40Ar/39Ar	Lange et al. (2000)		North Table (isochron age, whole rock
					1.78	0.04	40Ar/39Ar	Lange et al. (2000)		Steamboat Mountain (plateau age, phlogopite)
					1.77	0.02	40Ar/39Ar	Lange et al. (2000)		Steamboat Mountain (plateau age, whole rock)
					2.03	0.03	40Ar/39Ar	Lange et al. (2000)		Middle Table (plateau age, phlogopite)
					2.02	0.04	40Ar/39Ar	Lange et al. (2000)		Middle Table (plateau age, whole rock)
					2.23	0.04	40Ar/39Ar	Lange et al. (2000)		Boar's Tusk (plateau age, phlogopite)
					2.19	0.04	40Ar/39Ar	Lange et al. (2000)		Boar's Tusk (plateau age, whole rock)
					2.53	0.06	40Ar/39Ar	Lange et al. (2000)		South Table (plateau age, phlogopite)
Sonora (Mexico)	Pinacate		416	8	0.00392	6e-05	Sec. Var.	Lutz and Gutmann (1995); Alva-Valdivia et al. (2019)		416 is estimated number of Quaternary centers. Age is from Cerro Colorado, but contradicts stratigraphic relationships of Zawacki et al. (2019).
					0.011	0.001	Sec. Var.	Rodríguez-Trejo et al. (2019)
					0.012	0.003	Sec. Var..	Rodríguez-Trejo et al. (2019)
					0.012	0.004	40Ar/39Ar	Gutmann et al. (2000)		La Laja cone
					0.0135	0.0005	Sec. Var.	Rodríguez-Trejo et al. (2019)		Ives flow
					0.013	0.003	40Ar/39Ar	Turrin et al. (2008)		Ives flow
					0.027	0.006	40Ar/39Ar	Gutmann et al. (2000)		Tecolote cone
					0.032	0.006	40Ar/39Ar	Gutmann and Turrin (2006; reported in García-Abdeslem and Calumus, 2015)
					0.038	0.008	40Ar/39Ar	Gutmann et al. (2000)		Carnegie Peak flow
					0.12	0.05	K-Ar	Damon et al. (1996)		Tres Marias flow
					0.15	0.019	K-Ar	Damon et al. (1996)		Elegante basalt
					0.19	0.035	K-Ar	Damon et al. (1996)		Elegante basalt
					0.19	0.05	K-Ar	Lynch et al. (1993)		MacDougal crater
					0.34	0.07	K-Ar	Damon et al. (1996)
					0.41	0.041	K-Ar	Damon et al. (1996)
					0.43	0.06	K-Ar	Damon et al. (1996)		Elegante basalt
					0.46	0.05	K-Ar	Damon et al. (1996)		Crater Elegante basalt
					0.46	0.12	K-Ar	Damon et al. (1996)		Crater Elegante basalt
					0.47	0.029	K-Ar	Damon et al. (1996)
					0.66	0.058	K-Ar	Damon et al. (1996)
					0.86	0.029	K-Ar	Damon et al. (1996)		Santa Clara shield volcano
					1.01	0.03	K-Ar	Damon et al. (1996)
					1.05	0.25	K-Ar	Damon et al. (1996)
					1.1	0.03	K-Ar	Damon et al. (1996)
					1.19	0.06	K-Ar	Damon et al. (1996)		Santa Clara shield volcano
					1.15	0.03	K-Ar	Lynch et al. (1993)		Santa Clara shield volcano (basaltic trachyandesite)
					1.35	0.04	K-Ar	Damon et al. (1996)		Santa Clara shield volcano
					1.45	0.03	K-Ar	Damon et al. (1996)		Santa Clara shield volcano
					1.55	0.3	K-Ar	Damon et al. (1996)		Sierra Blanca basalt
					1.7	0.07	K-Ar	Lynch et al. (1993)		Santa Clara shield volcano
	TOTAL Quaternary Basaltic Centers		2229		Total age dates			789	Total volcanoes aged <50 ka	52
	TOTAL in USA		1813		Total Quaternary basaltic volcanoes dated***			548	Total Holocene volcanoes	22-29
					Volcanoes with age dates by K-Ar only***			225
*Ages rounded to nearest kyr in most cases. Dates enclosed by a box are inferred to be from a single eruptive episode (which in some cases produced multiple volcanoes/cones, in some cases irresolvable by age data). In some cases (where noted) the only mean of multiple determinations is given.
**Some errors reported as 1-sigma, others as 2-sigma; refer to original sources for details. Blank cells indicate that error is not provided in published source.
***Does not account for unknown number of the Quaternary volcanoes for which there are multiple age determinations at Cima volcanic field.

## Sheet: San Fran. Volc. Field evolved
Quaternary age dates for intermediate to silicic rocks of San Francisco Volcanic Field, Arizona
State	Volcanic field name		Age data (Ma)*	Error (+/- Ma)**	Method	Data sources		Comments
Arizona	San Francisco		0.8	0.11	K/Ar	Ulrich and Bailey (1987)		Qsfp - San Francisco Mtn pumice fall
			2.06	0.18	K/Ar	Newhall et al. (1987)		Howard Mesa andesite
			1.54	0.02	K/Ar	Wolfe et al. (1987b)		Slate Mtn rhyolite
			0.49	0.06	K/Ar	Wolfe et al. (1987a)		Mt Elden
			0.57	0.03	K/Ar	Wolfe et al. (1987a)		Mt Elden
			0.75	0.04	K/Ar	Wolfe et al. (1987a)		Qsd1 SF Mtn
			0.87	0.15	K/Ar	Wolfe et al. (1987a)		Qdr SF Mtn
			0.6	0.08	K/Ar	Wolfe et al. (1987a)		Qaa2
			2.26	0.1	K/Ar	Wolfe et al. (1987a)		V2405 Sitgreaves rhyolite
			2.46	0.11	K/Ar	Wolfe et al. (1987a)		V2405 Sitgreaves rhyolite
			2.1	0.03	K/Ar	Wolfe et al. (1987a)		Govt Mtn rhyolite
			1.64	0.11	K/Ar	Wolfe et al. (1987a)		Hochderfer Hills rhyolite
			2.15	0.13	K/Ar	Wolfe et al. (1987a)		Tkpr rhyolite
			1.64	0.11	K/Ar	Wolfe et al. (1987a)		Kendrick Pk summit andesite
			1.35	0.05	K/Ar	Wolfe et al. (1987a)		Qka
			2.37	0.21	K/Ar	Wolfe et al. (1987a)		Kendrick dacite
			2.06	0.07	K/Ar	Wolfe et al. (1987a)		Qka
			2.09	0.12	K/Ar	Wolfe et al. (1987a)		Tkdh
			1.79	0.03	K/Ar	Wolfe et al. (1987a)		Qkdg
			1.14	0.17	K/Ar	Wolfe et al. (1987a)		Qmt
			1.9	0.35	K/Ar	Wolfe et al. (1987a)		Qslr1 Slate Mtn
			1.54	0.02	K/Ar	Wolfe et al. (1987a)		Qslr2 Slate mtn
			0.4	0.03	K/Ar	Wolfe et al. (1987a)		Qdd3
			1.82	0.16	K/Ar	Wolfe et al. (1987a)		Qrr1
			0.95	0.2	K/Ar	Wolfe et al. (1987a)		Qdi
			0.92	0.03	K/Ar	Wolfe et al. (1987a)		Qdi
			0.76	0.03	K/Ar	Wolfe et al. (1987a)		Qa1
			0.75	0.17	K/Ar	Wolfe et al. (1987a)		Qsfd
			0.87	0.03	K/Ar	Wolfe et al. (1987a)		Qcr
			0.95	0.08	K/Ar	Wolfe et al. (1987a)		Qri
			0.7	0.1	K/Ar	Wolfe et al. (1987a)		Qdr
			2.3	0.87	K/Ar	Newhall et al. (1987)		Tsp rhyolite pumice
			1.9	0.12	K/Ar	Newhall et al. (1987)		Sitgreaves Mtn rhyolite
			0.66	0.03	K/Ar	Wolfe et al. (1987a)		Qca
			0.589	0.011	40Ar/39Ar	Karatson et al. (2010)		612 older andesite
			0.556	0.013	40Ar/39Ar	Karátson et al. (2010)		642 older andesite
			0.514	0.021	40Ar/39Ar	Karátson et al. (2010)		106 younger andesite
			0.505	0.009	40Ar/39Ar	Karátson et al. (2010)		97 younger andesite
			0.43	0.03	K/Ar	Wolfe et al. (1987a)		Qa2
			0.53	0.058	40Ar/39Ar	Karátson et al. (2010)		188 younger dacite
			0.41	0.16	K/Ar	Wolfe et al. (1987a)		Qlmd
			0.17	0.04	K/Ar	Moore and Wolfe (1987)		Qdmd Deadman Mesa
			0.25	0.03	40Ar/39Ar	Morgan et al. (2004)		Deadman Mesa Flow
			0.22	0.02	K/Ar	Wolfe et al. (1987a)		Sugarloaf
			0.091	0.002	40Ar/39Ar	Morgan et al. (2004)		Sugarloaf
			0.25	0.04	K/Ar	Moore and Wolfe (1987)		Oleary
			0.271	0.06	40Ar/39Ar	Morgan et al. (2004)		O'Leary
